## Correction for: Has-miR-300—GADD45B promotes melanoma growth via cell cycle

Long Chen<sup>1,2,3,4,\*</sup>, Chenglong Fang<sup>5,\*</sup>, Xiaoxue Yuan<sup>2,\*</sup>, Mengqi Liu<sup>2</sup>, Ping Wu<sup>1</sup>, Li Zhong<sup>2</sup>, Zhiyong Chen<sup>1,2</sup>

<sup>1</sup>Department of Burn Plastic and Cosmetology, Affiliated Fuling Hospital, Chongqing University, Chongqing 408099, China

<sup>2</sup>College of Bioengineering, Chongqing University, Chongqing 400000, China

<sup>3</sup>Department of Immunology, School of Basic Medical Sciences, Chengdu Medical College, Chengdu 610500, Sichuan, China

<sup>4</sup>Non-Coding RNA and Drug Discovery Key Laboratory of Sichuan Province, Chengdu Medical College, Chengdu 610500, Sichuan, China

<sup>5</sup>Department of Rehabilitation, LinYi People's Hospital, Linyi 276000, Shandong, China

\*Equal contribution

**Correspondence to:** Zhiyong Chen; email: [czy1002008@cqu.edu.cn](mailto:czy1002008@cqu.edu.cn)

**Keywords:** miR-300, GADD45B, CDKN1A, cell cycle, melanoma

**Original article:** *Aging (Albany NY)* 2023; 15: pp 13920—13943

PMID: [38070141](https://pubmed.ncbi.nlm.nih.gov/38070141/)

PMCID: [PMC10756120](https://pubmed.ncbi.nlm.nih.gov/PMC10756120/)

doi: [10.18632/aging.205276](https://doi.org/10.18632/aging.205276)

**This article has been corrected:** The authors corrected the listed affiliations by combining affiliations 1 and 2 into affiliation 1 after those two units officially established a partnership and merged into a single unit. They also acknowledged Dr. Li Zhong as a co-corresponding author. The correct authors list with the corresponding affiliations is presented below.

Long Chen<sup>1,2,3,\*</sup>, Chenglong Fang<sup>4,\*</sup>, Xiaoxue Yuan<sup>1,\*</sup>, Mengqi Liu<sup>1</sup>, Ping Wu<sup>1</sup>, Li Zhong<sup>1,#</sup>, Zhiyong Chen<sup>1,#</sup>

<sup>1</sup>College of Bioengineering and Department of Burn Plastic and Cosmetology, Affiliated Fuling Hospital, Chongqing University, Chongqing 408099, China

<sup>2</sup>Department of Immunology, School of Basic Medical Sciences, Chengdu Medical College, Chengdu 610500, Sichuan, China

<sup>3</sup>Non-Coding RNA and Drug Discovery Key Laboratory of Sichuan Province, Chengdu Medical College, Chengdu 610500, Sichuan, China

<sup>4</sup>Department of Rehabilitation, LinYi People's Hospital, Linyi 276000, Shandong, China

\*Equal contribution

#Co-corresponding authors

**Correspondence to:** Li Zhong, Zhiyong Chen; email: [jlzhong@cqu.edu.cn](mailto:jlzhong@cqu.edu.cn), [czy1002008@cqu.edu.cn](mailto:czy1002008@cqu.edu.cn)
